# Supplementary material for: Nosokomiale Infektionen und Antibiotikaanwendung in Langzeitpflegeeinrichtungen. Deutsche Ergebnisse der dritten europäischen Punkt-Prävalenz-Erhebung HALT-3
Source: Springer Nature journal article supplement (doi:10.1007/s00103-022-03566-3), 2022-08-11
Supplement: MOESM4 [file 23357704]

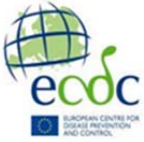

EUROPÄISCHE PUNKTPRÄVALENZSTUDIE ZUM VORKOMMEN VON  
NOSOKOMIALEN INFEKTIONEN UND ZUM EINSATZ VON ANTIBIOTIKA IN  
LANGZEITPFLEGE-EINRICHTUNGEN (HALT-3)

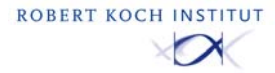

## BEWOHNERFRAGEBOGEN

### BEWOHNERDATEN

|                                                |                                            |                                                                         |
|------------------------------------------------|--------------------------------------------|-------------------------------------------------------------------------|
| Geschlecht                                     | <input type="checkbox"/> Männlich          | <input type="checkbox"/> Weiblich                                       |
| Geburtsjahr                                    | <input type="text"/>                       |                                                                         |
| Aufenthalt in dieser Einrichtung               | <input type="checkbox"/> Kürzer als 1 Jahr | <input type="checkbox"/> 1 Jahr oder länger                             |
| Krankenhausaufenthalt in den letzten 3 Monaten | <input type="checkbox"/> Ja                | <input type="checkbox"/> Nein                                           |
| Operation in den letzten 30 Tagen              | <input type="checkbox"/> Ja                | <input type="checkbox"/> Nein                                           |
| Harnwegskatheter                               | <input type="checkbox"/> Ja                | <input type="checkbox"/> Nein                                           |
| Gefäßkatheter                                  | <input type="checkbox"/> Ja                | <input type="checkbox"/> Nein                                           |
| Inkontinenz (Harn und/oder Stuhl)              | <input type="checkbox"/> Ja                | <input type="checkbox"/> Nein                                           |
| Wunden:                                        |                                            |                                                                         |
| <input type="radio"/> Dekubitus                | <input type="checkbox"/> Ja                | <input type="checkbox"/> Nein                                           |
| <input type="radio"/> Andere Wunden            | <input type="checkbox"/> Ja                | <input type="checkbox"/> Nein                                           |
| Zeitlich und/oder örtlich Desorientiertheit    | <input type="checkbox"/> Ja                | <input type="checkbox"/> Nein                                           |
| Mobilität                                      | <input type="checkbox"/> Selbstständig     | <input type="checkbox"/> Rollstuhl <input type="checkbox"/> Bettlägerig |

### AM TAG DER ERHEBUNG:

ERHÄLT DER BEWOHNER EINE SYSTEMISCHE ANTIBIOTIKATHERAPIE

> **BITTE TEIL A DES FRAGEBOGENS AUSFÜLLEN**

einschließlich: (i) Bewohner mit prophylaktischer Antibiotikabehandlung

**ODER** (ii) Bewohner mit therapeutischer Antibiotikabehandlung (bei Behandlungsbeginn vor Aufnahme sollten keine Beschwerden/Symptome aufgezeichnet werden)

ZEIGT DER BEWOHNER BESCHWERDEN/SYMPTOME EINER INFEKTION

> **BITTE TEIL B DES FRAGEBOGENS AUSFÜLLEN**

Nur Beschwerden/Symptome, die bei Aufnahme des Bewohners in die Einrichtung nicht schon vorhanden oder in Inkubation waren **UND** (noch) keine Antibiotikatherapie

**BEIDES: ANTIBIOTIKATHERAPIE UND BESCHWERDEN/SYMPTOME EINER INFEKTION**

> **BITTE TEIL A UND TEIL B DES FRAGEBOGENS AUSFÜLLEN** einschließlich: (i) Bewohner mit Beschwerden/Symptomen und mit Antibiotikatherapie am heutigen Tag (unabhängig davon ob die antibiotische Therapie im Zusammenhang mit dieser Infektion steht) **ODER**

(ii) Bewohner, die keine Beschwerden/Symptome mehr aufweisen, aber noch antibiotisch aufgrund dieser Infektion behandelt werden

TEIL A: DATEN ZUR ANTIBIOTISCHEN THERAPIE

|                                                        | ANTIBIOTIKUM 1                                                                                                                                                                                                                                                                                                                                                                                                                                                                                                                       | ANTIBIOTIKUM 2                                                                                                                                                                                                                                                                                                                                                                                                                                                                                                                        | ANTIBIOTIKUM 3                                                                                                                                                                                                                                                                                                                                                                                                                                                                                                                       | ANTIBIOTIKUM 4                                                                                                                                                                                                                                                                                                                                                                                                                                                                                                                       |
|--------------------------------------------------------|--------------------------------------------------------------------------------------------------------------------------------------------------------------------------------------------------------------------------------------------------------------------------------------------------------------------------------------------------------------------------------------------------------------------------------------------------------------------------------------------------------------------------------------|---------------------------------------------------------------------------------------------------------------------------------------------------------------------------------------------------------------------------------------------------------------------------------------------------------------------------------------------------------------------------------------------------------------------------------------------------------------------------------------------------------------------------------------|--------------------------------------------------------------------------------------------------------------------------------------------------------------------------------------------------------------------------------------------------------------------------------------------------------------------------------------------------------------------------------------------------------------------------------------------------------------------------------------------------------------------------------------|--------------------------------------------------------------------------------------------------------------------------------------------------------------------------------------------------------------------------------------------------------------------------------------------------------------------------------------------------------------------------------------------------------------------------------------------------------------------------------------------------------------------------------------|
| Name des Antibiotikums<br>(Handelsname oder Wirkstoff) | -----                                                                                                                                                                                                                                                                                                                                                                                                                                                                                                                                | -----                                                                                                                                                                                                                                                                                                                                                                                                                                                                                                                                 | -----                                                                                                                                                                                                                                                                                                                                                                                                                                                                                                                                | -----                                                                                                                                                                                                                                                                                                                                                                                                                                                                                                                                |
| Art der Applikation                                    | <input type="checkbox"/> oral<br><input type="checkbox"/> parenteral (i.m, i.v., s.c.)<br><input type="checkbox"/> andere                                                                                                                                                                                                                                                                                                                                                                                                            | <input type="checkbox"/> oral<br><input type="checkbox"/> parenteral (i.m, i.v., s.c.)<br><input type="checkbox"/> andere                                                                                                                                                                                                                                                                                                                                                                                                             | <input type="checkbox"/> oral<br><input type="checkbox"/> parenteral (i.m, i.v., s.c.)<br><input type="checkbox"/> andere                                                                                                                                                                                                                                                                                                                                                                                                            | <input type="checkbox"/> oral<br><input type="checkbox"/> parenteral (i.m, i.v., s.c.)<br><input type="checkbox"/> andere                                                                                                                                                                                                                                                                                                                                                                                                            |
| Datum Therapieende/<br>Kontrolluntersuchung bekannt?   | <input type="checkbox"/> Nein<br><input type="checkbox"/> Ja                                                                                                                                                                                                                                                                                                                                                                                                                                                                         | <input type="checkbox"/> Nein<br><input type="checkbox"/> Ja                                                                                                                                                                                                                                                                                                                                                                                                                                                                          | <input type="checkbox"/> Nein<br><input type="checkbox"/> Ja                                                                                                                                                                                                                                                                                                                                                                                                                                                                         | <input type="checkbox"/> Nein<br><input type="checkbox"/> Ja                                                                                                                                                                                                                                                                                                                                                                                                                                                                         |
| Art der Behandlung                                     | <input type="checkbox"/> Prophylaktisch<br><input type="checkbox"/> Therapeutisch                                                                                                                                                                                                                                                                                                                                                                                                                                                    | <input type="checkbox"/> Prophylaktisch<br><input type="checkbox"/> Therapeutisch                                                                                                                                                                                                                                                                                                                                                                                                                                                     | <input type="checkbox"/> Prophylaktisch<br><input type="checkbox"/> Therapeutisch                                                                                                                                                                                                                                                                                                                                                                                                                                                    | <input type="checkbox"/> Prophylaktisch<br><input type="checkbox"/> Therapeutisch                                                                                                                                                                                                                                                                                                                                                                                                                                                    |
| Indikation der Antibiotika-<br>therapie                | <input type="checkbox"/> Harnwege<br><input type="checkbox"/> Genitaltrakt<br><input type="checkbox"/> Haut o. Wunden<br><input type="checkbox"/> Atemwege<br><input type="checkbox"/> Magen-/Darmtrakt<br><input type="checkbox"/> Augen<br><input type="checkbox"/> Ohren/Nase/Mund<br><input type="checkbox"/> OP-Wunde<br><input type="checkbox"/> Tuberkulose<br><input type="checkbox"/> systemische Infektion<br><input type="checkbox"/> Fieber unklarer Genese<br><input type="checkbox"/> andere (bitte benennen)<br>----- | <input type="checkbox"/> Harnwege<br><input type="checkbox"/> Genitaltrakt<br><input type="checkbox"/> Haut o. Wunden<br><input type="checkbox"/> Atemwege<br><input type="checkbox"/> Magen-/Darmtrakt<br><input type="checkbox"/> Augen<br><input type="checkbox"/> Ohren/Nase/Mund<br><input type="checkbox"/> OP-Wunde<br><input type="checkbox"/> Tuberkulose<br><input type="checkbox"/> systemische Infek2tion<br><input type="checkbox"/> Fieber unklarer Genese<br><input type="checkbox"/> andere (bitte benennen)<br>----- | <input type="checkbox"/> Harnwege<br><input type="checkbox"/> Genitaltrakt<br><input type="checkbox"/> Haut o. Wunden<br><input type="checkbox"/> Atemwege<br><input type="checkbox"/> Magen-/Darmtrakt<br><input type="checkbox"/> Augen<br><input type="checkbox"/> Ohren/Nase/Mund<br><input type="checkbox"/> OP-Wunde<br><input type="checkbox"/> Tuberkulose<br><input type="checkbox"/> systemische Infektion<br><input type="checkbox"/> Fieber unklarer Genese<br><input type="checkbox"/> andere (bitte benennen)<br>----- | <input type="checkbox"/> Harnwege<br><input type="checkbox"/> Genitaltrakt<br><input type="checkbox"/> Haut o. Wunden<br><input type="checkbox"/> Atemwege<br><input type="checkbox"/> Magen-/Darmtrakt<br><input type="checkbox"/> Augen<br><input type="checkbox"/> Ohren/Nase/Mund<br><input type="checkbox"/> OP-Wunde<br><input type="checkbox"/> Tuberkulose<br><input type="checkbox"/> systemische Infektion<br><input type="checkbox"/> Fieber unklarer Genese<br><input type="checkbox"/> andere (bitte benennen)<br>----- |
| Wo wurde das Antibiotikum<br>verordnet?                | <input type="checkbox"/> In dieser Einrichtung<br><input type="checkbox"/> Im Krankenhaus<br><input type="checkbox"/> An anderer Stelle                                                                                                                                                                                                                                                                                                                                                                                              | <input type="checkbox"/> In dieser Einrichtung<br><input type="checkbox"/> Im Krankenhaus<br><input type="checkbox"/> An anderer Stelle                                                                                                                                                                                                                                                                                                                                                                                               | <input type="checkbox"/> In dieser Einrichtung<br><input type="checkbox"/> Im Krankenhaus<br><input type="checkbox"/> An anderer Stelle                                                                                                                                                                                                                                                                                                                                                                                              | <input type="checkbox"/> In dieser Einrichtung<br><input type="checkbox"/> Im Krankenhaus<br><input type="checkbox"/> An anderer Stelle                                                                                                                                                                                                                                                                                                                                                                                              |

TEIL B: DATEN ZU INFEKTIONEN

|                                                                                                                      |     | INFEKTION 1                                                                                                                                                                        | INFEKTION 2                                                                                                                                                                        | INFEKTION 3                                                                                                                                                                        | INFEKTION 4                                                                                                                                                                        |
|----------------------------------------------------------------------------------------------------------------------|-----|------------------------------------------------------------------------------------------------------------------------------------------------------------------------------------|------------------------------------------------------------------------------------------------------------------------------------------------------------------------------------|------------------------------------------------------------------------------------------------------------------------------------------------------------------------------------|------------------------------------------------------------------------------------------------------------------------------------------------------------------------------------|
| Infektionscode                                                                                                       |     | <input type="text"/>                                                                                                                                                               | <input type="text"/>                                                                                                                                                               | <input type="text"/>                                                                                                                                                               | <input type="text"/>                                                                                                                                                               |
| <i>Wenn „andere“ bitte angeben</i>                                                                                   |     | -----                                                                                                                                                                              | -----                                                                                                                                                                              | -----                                                                                                                                                                              | -----                                                                                                                                                                              |
| Am Tag der (Wieder-)Aufnahme in die Einrichtung bereits vorhanden gewesen                                            |     | <input type="checkbox"/> Nein<br><input type="checkbox"/> Ja                                                                                                                       | <input type="checkbox"/> Nein<br><input type="checkbox"/> Ja                                                                                                                       | <input type="checkbox"/> Nein<br><input type="checkbox"/> Ja                                                                                                                       | <input type="checkbox"/> Nein<br><input type="checkbox"/> Ja                                                                                                                       |
| Datum des Beginns                                                                                                    |     | <input type="text"/> / <input type="text"/> / <input type="text"/>                                                                                                                 | <input type="text"/> / <input type="text"/> / <input type="text"/>                                                                                                                 | <input type="text"/> / <input type="text"/> / <input type="text"/>                                                                                                                 | <input type="text"/> / <input type="text"/> / <input type="text"/>                                                                                                                 |
| Ort des Beginns                                                                                                      |     | <input type="checkbox"/> Diese Einrichtung<br><input type="checkbox"/> Eine andere Pflegeeinrichtung<br><input type="checkbox"/> Krankenhaus<br><input type="checkbox"/> unbekannt | <input type="checkbox"/> Diese Einrichtung<br><input type="checkbox"/> Eine andere Pflegeeinrichtung<br><input type="checkbox"/> Krankenhaus<br><input type="checkbox"/> unbekannt | <input type="checkbox"/> Diese Einrichtung<br><input type="checkbox"/> Eine andere Pflegeeinrichtung<br><input type="checkbox"/> Krankenhaus<br><input type="checkbox"/> unbekannt | <input type="checkbox"/> Diese Einrichtung<br><input type="checkbox"/> Eine andere Pflegeeinrichtung<br><input type="checkbox"/> Krankenhaus<br><input type="checkbox"/> unbekannt |
| A:<br>Name des Mikroorganismus                                                                                       | 1.A | <input type="text"/>                                                                                                                                                               | <input type="text"/>                                                                                                                                                               | <input type="text"/>                                                                                                                                                               | <input type="text"/>                                                                                                                                                               |
|                                                                                                                      | B   | <input type="text"/> <input type="text"/>                                                                                                                                          | <input type="text"/> <input type="text"/>                                                                                                                                          | <input type="text"/> <input type="text"/>                                                                                                                                          | <input type="text"/> <input type="text"/>                                                                                                                                          |
| B:<br>Getestete Antibiotikaresistenz                                                                                 | 2.A | <input type="text"/>                                                                                                                                                               | <input type="text"/>                                                                                                                                                               | <input type="text"/>                                                                                                                                                               | <input type="text"/>                                                                                                                                                               |
|                                                                                                                      | B   | <input type="text"/> <input type="text"/>                                                                                                                                          | <input type="text"/> <input type="text"/>                                                                                                                                          | <input type="text"/> <input type="text"/>                                                                                                                                          | <input type="text"/> <input type="text"/>                                                                                                                                          |
| Nur für STAAUR, ENC***, ACIBAU, PSEAER oder Enterobakterien (CIT***, ENB***, ESCCOL, KLE***, MOGSPP, PRT***, SER***) | 3.A | <input type="text"/>                                                                                                                                                               | <input type="text"/>                                                                                                                                                               | <input type="text"/>                                                                                                                                                               | <input type="text"/>                                                                                                                                                               |
|                                                                                                                      | B   | <input type="text"/> <input type="text"/>                                                                                                                                          | <input type="text"/> <input type="text"/>                                                                                                                                          | <input type="text"/> <input type="text"/>                                                                                                                                          | <input type="text"/> <input type="text"/>                                                                                                                                          |
