# Supplementary material for: Nosokomiale Infektionen und Antibiotikaanwendung in Langzeitpflegeeinrichtungen. Deutsche Ergebnisse der dritten europäischen Punkt-Prävalenz-Erhebung HALT-3
Source: Springer Nature journal article supplement (doi:10.1007/s00103-022-03566-3), 2022-08-11

Onlinematerial 5. Teilnehmende Pflegeeinrichtungen nach Bundesländern.

| Bundesland          | Pflegeeinrichtungen<br>(Anzahl) |
|---------------------|---------------------------------|
| Baden-Württemberg   | 16                              |
| Bayern              | 6                               |
| Berlin              | 1                               |
| Brandenburg         | 0                               |
| Bremen              | 0                               |
| Hamburg             | 2                               |
| Hessen              | 13                              |
| Mecklenburg-        | 5                               |
| Niedersachsen       | 2                               |
| Nordrhein-Westfalen | 36                              |
| Rheinland-Pfalz     | 12                              |
| Saarland            | 20                              |
| Sachsen             | 0                               |
| Sachsen-Anhalt      | 8                               |
| Schleswig-Holstein  | 3                               |
| Thüringen           | 6                               |

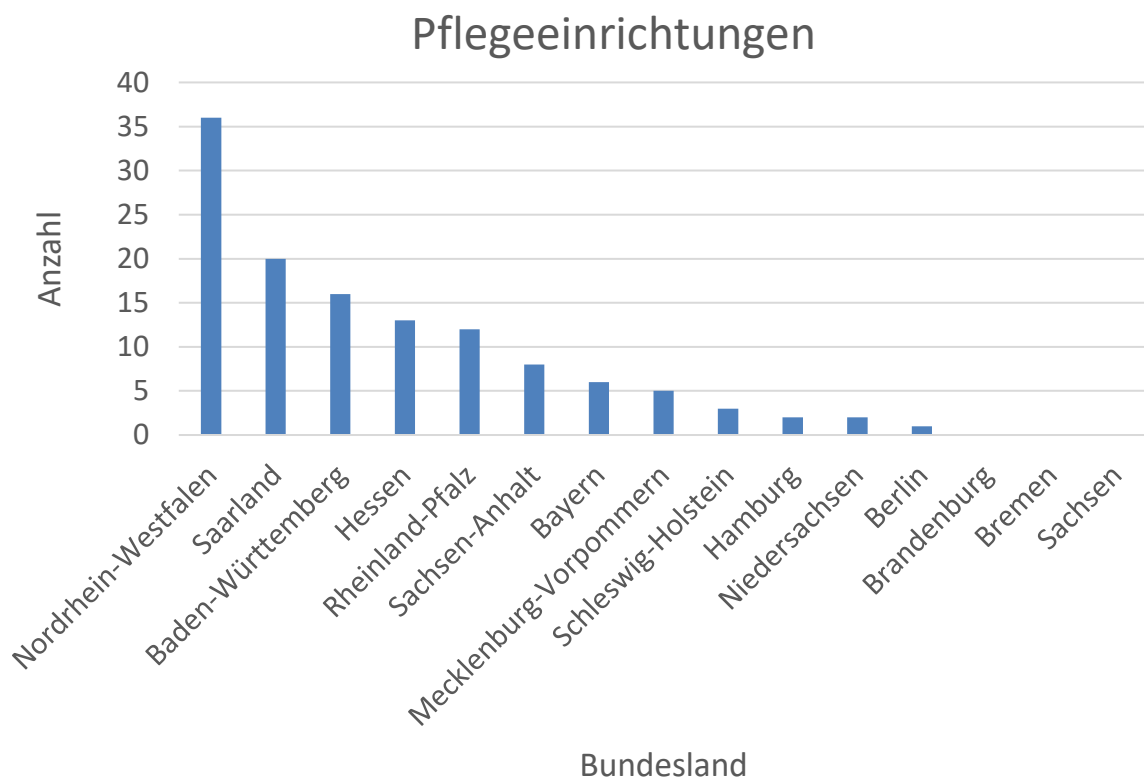

Supplement: MOESM5 [file 23357704]
