# Supplementary material for: Nosokomiale Infektionen und Antibiotikaanwendung in Langzeitpflegeeinrichtungen. Deutsche Ergebnisse der dritten europäischen Punkt-Prävalenz-Erhebung HALT-3
Source: Springer Nature journal article supplement (doi:10.1007/s00103-022-03566-3), 2022-08-11
Supplement: MOESM6 [file 23357704]

**Onlinematerial 6. Größe und Anzahl der LTCF mit Prävalenzen für NI und ABA nach Größe der LTCF.**

| Größe der LTCF (Anzahl von Betten)                                   | 0-50          | 51-100        | 101-150       | 151-200       | >250          |
|----------------------------------------------------------------------|---------------|---------------|---------------|---------------|---------------|
| <b>Anzahl der LTCF</b>                                               | 20            | 70            | 32            | 7             | 2             |
| <b>Prävalenz NI (%) (95%-KI)</b>                                     | 1,4 (0,6-2,8) | 1,8 (1,4-2,2) | 1,7 (1,3-2,1) | 1,7 (1,0-2,6) | 1,1 (0,4-2,4) |
| <b>Prävalenz NI in der eigenen Einrichtung erworben (%) (95%-KI)</b> | 1,4 (0,6-2,8) | 1,4 (1,1-1,7) | 1,2 (0,9-1,7) | 1,3 (0,7-2,1) | 1,1 (0,4-2,4) |
| - Minimum                                                            | 0,00          | 0,00          | 0,00          | 0,00          | 0,4           |
| - Maximum                                                            | 16,7          | 12,8          | 6,2           | 4,0           | 1,9           |
| - Mittelwert                                                         | 1,5           | 1,8           | 1,6           | 1,6           | 1,1           |
| <b>Prävalenz ABA (%) (95%-KI)</b>                                    | 2,3 (1,2-3,9) | 1,4 (1,1-1,7) | 1,3 (1,0-1,8) | 1,1 (0,6-1,9) | 0,9 (0,3-2,1) |
| - Minimum                                                            | 0,00          | 0,00          | 0,00          | 0,00          | 0,4           |
| - Maximum                                                            | 11,1          | 8,5           | 4,9           | 2,8           | 1,5           |
| - Mittelwert                                                         | 2,5           | 1,4           | 1,3           | 1,0           | 0,9           |

Legende: ABA - Antibiotikaaanwendung; KI – Konfidenzintervall; LTCF – Langzeitpflegeeinrichtung; NI - Nosokomiale Infektionen.
